# Supplementary material for: An end to the controversy over the microscopic detection and effects of pristine microplastics in fish organs
Source: PubMed Central journal article supplement (PMC7382502; doi:10.1038/s41598-020-69062-3), 2020-07-24
Supplement: 41598_2020_69062_MOESM2_ESM.pdf [file 41598_2020_69062_MOESM2_ESM.pdf]

**An end to the controversy over the microscopic detection and effects of pristine microplastics in fish organs.**

De Sales-Ribeiro, Carolina1\*; Brito Casillas, Yeray2; Fernandez, Antonio1; Caballero, María José1

1 Division of Veterinary Histology and Pathology, Institute for Animal Health and Food Safety (IUSA), Veterinary School, University of Las Palmas de Gran Canaria, Arucas, 35413, Spain

2 Research Institute in Biomedical and Health Sciences (IUIBS), University of Las Palmas de Gran Canaria, Las Palmas de Gran Canaria, 35016, Spain

Supplementary Tables

Supplementary Table S1. Histopathological assessment tools for intestine.

| D. rerio            | Test Group  | Sex | Circulatory Disturbances (rp1)      |   |       |                                          |   |                    | Regressive changes (rp2) |          |       |                     |   |         |                |          |       |                                          |   |                    |   |          |       |                     |   |       |   |   |       |   |   |   |   |   |   |   |   |   |   |   |   |   |   |   |   |   |   |   |   |   |
|---------------------|-------------|-----|-------------------------------------|---|-------|------------------------------------------|---|--------------------|--------------------------|----------|-------|---------------------|---|---------|----------------|----------|-------|------------------------------------------|---|--------------------|---|----------|-------|---------------------|---|-------|---|---|-------|---|---|---|---|---|---|---|---|---|---|---|---|---|---|---|---|---|---|---|---|---|
|                     |             |     | Haemorrhage / hyperaemia / aneurysm |   |       | Intercellular oedema                     |   |                    | Epithelium               |          |       |                     |   |         | Lamina Propria |          |       |                                          |   |                    |   |          |       |                     |   |       |   |   |       |   |   |   |   |   |   |   |   |   |   |   |   |   |   |   |   |   |   |   |   |   |
|                     |             |     | I org rp                            |   |       | Architectural and structural alterations |   | Plasma alterations |                          | Deposits |       | Nuclear alterations |   | Atrophy |                | Necrosis |       | Architectural and structural alterations |   | Plasma alterations |   | Deposits |       | Nuclear alterations |   |       |   |   |       |   |   |   |   |   |   |   |   |   |   |   |   |   |   |   |   |   |   |   |   |   |
|                     |             |     | w                                   | a | a x w | w                                        | a | a x w              | w                        | a        | a x w | w                   | a | a x w   | w              | a        | a x w | w                                        | a | a x w              | w | a        | a x w | w                   | a | a x w | w | a | a x w |   |   |   |   |   |   |   |   |   |   |   |   |   |   |   |   |   |   |   |   |   |
| T0                  | CONTROL     | F   | 1                                   | 0 | 0     | 1                                        | 0 | 0                  | 0                        | 0        | 0     | 1                   | 0 | 0       | 1              | 0        | 0     | 1                                        | 0 | 0                  | 2 | 0        | 0     | 2                   | 0 | 0     | 3 | 0 | 0     | 1 | 0 | 0 | 1 | 0 | 0 | 2 | 0 | 0 | 2 | 0 | 0 | 2 | 0 | 0 | 2 | 0 | 0 |   |   |   |
|                     |             | F   | 1                                   | 0 | 0     | 1                                        | 0 | 0                  | 0                        | 0        | 0     | 1                   | 0 | 0       | 1              | 0        | 0     | 1                                        | 0 | 0                  | 2 | 0        | 0     | 2                   | 0 | 0     | 3 | 0 | 0     | 1 | 0 | 0 | 1 | 0 | 0 | 2 | 0 | 0 | 2 | 0 | 0 | 2 | 0 | 0 | 2 | 0 | 0 |   |   |   |
|                     |             | M   | 1                                   | 0 | 0     | 1                                        | 0 | 0                  | 0                        | 0        | 0     | 1                   | 0 | 0       | 1              | 0        | 0     | 1                                        | 0 | 0                  | 2 | 0        | 0     | 2                   | 0 | 0     | 3 | 0 | 0     | 1 | 0 | 0 | 1 | 0 | 0 | 2 | 0 | 0 | 2 | 0 | 0 | 2 | 0 | 0 | 2 | 0 | 0 | 2 | 0 | 0 |
|                     |             | M   | 1                                   | 0 | 0     | 1                                        | 0 | 0                  | 0                        | 0        | 0     | 1                   | 0 | 0       | 1              | 0        | 0     | 1                                        | 0 | 0                  | 2 | 0        | 0     | 2                   | 0 | 0     | 3 | 0 | 0     | 1 | 0 | 0 | 1 | 0 | 0 | 2 | 0 | 0 | 2 | 0 | 0 | 2 | 0 | 0 | 2 | 0 | 0 | 2 | 0 | 0 |
| T30                 | FLUORESCENT | F   | 1                                   | 0 | 0     | 1                                        | 0 | 0                  | 0                        | 0        | 0     | 1                   | 0 | 0       | 1              | 0        | 0     | 1                                        | 0 | 0                  | 2 | 0        | 0     | 2                   | 0 | 0     | 3 | 0 | 0     | 1 | 0 | 0 | 1 | 0 | 0 | 2 | 0 | 0 | 2 | 0 | 0 | 2 | 0 | 0 | 2 | 0 | 0 |   |   |   |
|                     |             | F   | 1                                   | 0 | 0     | 1                                        | 0 | 0                  | 0                        | 0        | 0     | 1                   | 0 | 0       | 1              | 0        | 0     | 1                                        | 0 | 0                  | 2 | 0        | 0     | 2                   | 0 | 0     | 3 | 0 | 0     | 1 | 0 | 0 | 1 | 0 | 0 | 2 | 0 | 0 | 2 | 0 | 0 | 2 | 0 | 0 | 2 | 0 | 0 |   |   |   |
|                     |             | F   | 1                                   | 0 | 0     | 1                                        | 0 | 0                  | 0                        | 0        | 0     | 1                   | 0 | 0       | 1              | 0        | 0     | 1                                        | 0 | 0                  | 2 | 0        | 0     | 2                   | 0 | 0     | 3 | 0 | 0     | 1 | 0 | 0 | 1 | 0 | 0 | 2 | 0 | 0 | 2 | 0 | 0 | 2 | 0 | 0 | 2 | 0 | 0 |   |   |   |
|                     |             | M   | 1                                   | 0 | 0     | 1                                        | 0 | 0                  | 0                        | 0        | 0     | 1                   | 0 | 0       | 1              | 0        | 0     | 1                                        | 0 | 0                  | 2 | 0        | 0     | 2                   | 0 | 0     | 3 | 0 | 0     | 1 | 0 | 0 | 1 | 0 | 0 | 2 | 0 | 0 | 2 | 0 | 0 | 2 | 0 | 0 | 2 | 0 | 0 |   |   |   |
|                     |             | M   | 1                                   | 0 | 0     | 1                                        | 0 | 0                  | 0                        | 0        | 0     | 1                   | 0 | 0       | 1              | 0        | 0     | 1                                        | 0 | 0                  | 2 | 0        | 0     | 2                   | 0 | 0     | 3 | 0 | 0     | 1 | 0 | 0 | 1 | 0 | 0 | 2 | 0 | 0 | 2 | 0 | 0 | 2 | 0 | 0 | 2 | 0 | 0 |   |   |   |
|                     |             | M   | 1                                   | 0 | 0     | 1                                        | 0 | 0                  | 0                        | 0        | 0     | 1                   | 0 | 0       | 1              | 0        | 0     | 1                                        | 0 | 0                  | 2 | 0        | 0     | 2                   | 0 | 0     | 3 | 0 | 0     | 1 | 0 | 0 | 1 | 0 | 0 | 2 | 0 | 0 | 2 | 0 | 0 | 2 | 0 | 0 | 2 | 0 | 0 |   |   |   |
| T30                 | COSMETIC    | F   | 1                                   | 0 | 0     | 1                                        | 0 | 0                  | 0                        | 0        | 0     | 1                   | 0 | 0       | 1              | 0        | 0     | 1                                        | 0 | 0                  | 2 | 0        | 0     | 2                   | 0 | 0     | 3 | 0 | 0     | 1 | 0 | 0 | 1 | 0 | 0 | 2 | 0 | 0 | 2 | 0 | 0 | 2 | 0 | 0 | 2 | 0 | 0 |   |   |   |
|                     |             | F   | 1                                   | 0 | 0     | 1                                        | 0 | 0                  | 0                        | 0        | 0     | 1                   | 0 | 0       | 1              | 0        | 0     | 1                                        | 0 | 0                  | 2 | 0        | 0     | 2                   | 0 | 0     | 3 | 0 | 0     | 1 | 0 | 0 | 1 | 0 | 0 | 2 | 0 | 0 | 2 | 0 | 0 | 2 | 0 | 0 |   |   |   |   |   |   |
|                     |             | F   | 1                                   | 0 | 0     | 1                                        | 0 | 0                  | 0                        | 0        | 0     | 1                   | 0 | 0       | 1              | 0        | 0     | 1                                        | 0 | 0                  | 2 | 0        | 0     | 2                   | 0 | 0     | 3 | 0 | 0     | 1 | 0 | 0 | 1 | 0 | 0 | 2 | 0 | 0 | 2 | 0 | 0 | 2 | 0 | 0 |   |   |   |   |   |   |
|                     |             | M   | 1                                   | 0 | 0     | 1                                        | 0 | 0                  | 0                        | 0        | 0     | 1                   | 0 | 0       | 1              | 0        | 0     | 1                                        | 0 | 0                  | 2 | 0        | 0     | 2                   | 0 | 0     | 3 | 0 | 0     | 1 | 0 | 0 | 1 | 0 | 0 | 2 | 0 | 0 | 2 | 0 | 0 | 2 | 0 | 0 |   |   |   |   |   |   |
| T30                 | CONTROL     | F   | 1                                   | 0 | 0     | 1                                        | 0 | 0                  | 0                        | 0        | 0     | 1                   | 0 | 0       | 1              | 0        | 0     | 1                                        | 0 | 0                  | 2 | 0        | 0     | 2                   | 0 | 0     | 3 | 0 | 0     | 1 | 0 | 0 | 1 | 0 | 0 | 2 | 0 | 0 | 2 | 0 | 0 | 2 | 0 | 0 | 2 | 0 | 0 |   |   |   |
|                     |             | F   | 1                                   | 0 | 0     | 1                                        | 0 | 0                  | 0                        | 0        | 0     | 1                   | 0 | 0       | 1              | 0        | 0     | 1                                        | 0 | 0                  | 2 | 0        | 0     | 2                   | 0 | 0     | 3 | 0 | 0     | 1 | 0 | 0 | 1 | 0 | 0 | 2 | 0 | 0 | 2 | 0 | 0 | 2 | 0 | 0 |   |   |   |   |   |   |
|                     |             | M   | 1                                   | 0 | 0     | 1                                        | 0 | 0                  | 0                        | 0        | 0     | 1                   | 0 | 0       | 1              | 0        | 0     | 1                                        | 0 | 0                  | 2 | 0        | 0     | 2                   | 0 | 0     | 3 | 0 | 0     | 1 | 0 | 0 | 1 | 0 | 0 | 2 | 0 | 0 | 2 | 0 | 0 | 2 | 0 | 0 |   |   |   |   |   |   |
|                     |             | M   | 1                                   | 0 | 0     | 1                                        | 0 | 0                  | 0                        | 0        | 0     | 1                   | 0 | 0       | 1              | 0        | 0     | 1                                        | 0 | 0                  | 2 | 0        | 0     | 2                   | 0 | 0     | 3 | 0 | 0     | 1 | 0 | 0 | 1 | 0 | 0 | 2 | 0 | 0 | 2 | 0 | 0 | 2 | 0 | 0 |   |   |   |   |   |   |
| T45                 | FLUORESCENT | F   | 1                                   | 0 | 0     | 1                                        | 0 | 0                  | 0                        | 0        | 0     | 1                   | 0 | 0       | 1              | 0        | 0     | 1                                        | 0 | 0                  | 2 | 0        | 0     | 2                   | 0 | 0     | 3 | 0 | 0     | 1 | 0 | 0 | 1 | 0 | 0 | 2 | 0 | 0 | 2 | 0 | 0 | 2 | 0 | 0 | 2 | 0 | 0 |   |   |   |
|                     |             | F   | 1                                   | 0 | 0     | 1                                        | 0 | 0                  | 0                        | 0        | 0     | 1                   | 0 | 0       | 1              | 0        | 0     | 1                                        | 0 | 0                  | 2 | 0        | 0     | 2                   | 0 | 0     | 3 | 0 | 0     | 1 | 0 | 0 | 1 | 0 | 0 | 2 | 0 | 0 | 2 | 0 | 0 | 2 | 0 | 0 |   |   |   |   |   |   |
|                     |             | F   | 1                                   | 0 | 0     | 1                                        | 0 | 0                  | 0                        | 0        | 0     | 1                   | 0 | 0       | 1              | 0        | 0     | 1                                        | 0 | 0                  | 2 | 0        | 0     | 2                   | 0 | 0     | 3 | 0 | 0     | 1 | 0 | 0 | 1 | 0 | 0 | 2 | 0 | 0 | 2 | 0 | 0 | 2 | 0 | 0 |   |   |   |   |   |   |
|                     |             | M   | 1                                   | 0 | 0     | 1                                        | 0 | 0                  | 0                        | 0        | 0     | 1                   | 0 | 0       | 1              | 0        | 0     | 1                                        | 0 | 0                  | 2 | 0        | 0     | 2                   | 0 | 0     | 3 | 0 | 0     | 1 | 0 | 0 | 1 | 0 | 0 | 2 | 0 | 0 | 2 | 0 | 0 | 2 | 0 | 0 |   |   |   |   |   |   |
|                     |             | M   | 1                                   | 0 | 0     | 1                                        | 0 | 0                  | 0                        | 0        | 0     | 1                   | 0 | 0       | 1              | 0        | 0     | 1                                        | 0 | 0                  | 2 | 0        | 0     | 2                   | 0 | 0     | 3 | 0 | 0     | 1 | 0 | 0 | 1 | 0 | 0 | 2 | 0 | 0 | 2 | 0 | 0 | 2 | 0 | 0 |   |   |   |   |   |   |
|                     |             | M   | 1                                   | 0 | 0     | 1                                        | 0 | 0                  | 0                        | 0        | 0     | 1                   | 0 | 0       | 1              | 0        | 0     | 1                                        | 0 | 0                  | 2 | 0        | 0     | 2                   | 0 | 0     | 3 | 0 | 0     | 1 | 0 | 0 | 1 | 0 | 0 | 2 | 0 | 0 | 2 | 0 | 0 | 2 | 0 | 0 |   |   |   |   |   |   |
| T45                 | COSMETIC    | F   | 1                                   | 0 | 0     | 1                                        | 0 | 0                  | 0                        | 0        | 0     | 1                   | 0 | 0       | 1              | 0        | 0     | 1                                        | 0 | 0                  | 2 | 0        | 0     | 2                   | 0 | 0     | 3 | 0 | 0     | 1 | 0 | 0 | 1 | 0 | 0 | 2 | 0 | 0 | 2 | 0 | 0 | 2 | 0 | 0 |   |   |   |   |   |   |
|                     |             | F   | 1                                   | 0 | 0     | 1                                        | 0 | 0                  | 0                        | 0        | 0     | 1                   | 0 | 0       | 1              | 0        | 0     | 1                                        | 0 | 0                  | 2 | 0        | 0     | 2                   | 0 | 0     | 3 | 0 | 0     | 1 | 0 | 0 | 1 | 0 | 0 | 2 | 0 | 0 | 2 | 0 | 0 |   |   |   |   |   |   |   |   |   |
|                     |             | F   | 1                                   | 0 | 0     | 1                                        | 0 | 0                  | 0                        | 0        | 0     | 1                   | 0 | 0       | 1              | 0        | 0     | 1                                        | 0 | 0                  | 2 | 0        | 0     | 2                   | 0 | 0     | 3 | 0 | 0     | 1 | 0 | 0 | 1 | 0 | 0 | 2 | 0 | 0 | 2 | 0 | 0 |   |   |   |   |   |   |   |   |   |
|                     |             | M   | 1                                   | 0 | 0     | 1                                        | 0 | 0                  | 0                        | 0        | 0     | 1                   | 0 | 0       | 1              | 0        | 0     | 1                                        | 0 | 0                  | 2 | 0        | 0     | 2                   | 0 | 0     | 3 | 0 | 0     | 1 | 0 | 0 | 1 | 0 | 0 | 2 | 0 | 0 | 2 | 0 | 0 |   |   |   |   |   |   |   |   |   |
| T45                 | CONTROL     | F   | 1                                   | 0 | 0     | 1                                        | 0 | 0                  | 0                        | 0        | 0     | 1                   | 0 | 0       | 1              | 0        | 0     | 1                                        | 0 | 0                  | 2 | 0        | 0     | 2                   | 0 | 0     | 3 | 0 | 0     | 1 | 0 | 0 | 1 | 0 | 0 | 2 | 0 | 0 | 2 | 0 | 0 | 2 | 0 | 0 |   |   |   |   |   |   |
|                     |             | F   | 1                                   | 0 | 0     | 1                                        | 0 | 0                  | 0                        | 0        | 0     | 1                   | 0 | 0       | 1              | 0        | 0     | 1                                        | 0 | 0                  | 2 | 0        | 0     | 2                   | 0 | 0     | 3 | 0 | 0     | 1 | 0 | 0 | 1 | 0 | 0 | 2 | 0 | 0 | 2 | 0 | 0 |   |   |   |   |   |   |   |   |   |
|                     |             | M   | 1                                   | 0 | 0     | 1                                        | 0 | 0                  | 0                        | 0        | 0     | 1                   | 0 | 0       | 1              | 0        | 0     | 1                                        | 0 | 0                  | 2 | 0        | 0     | 2                   | 0 | 0     | 3 | 0 | 0     | 1 | 0 | 0 | 1 | 0 | 0 | 2 | 0 | 0 | 2 | 0 | 0 |   |   |   |   |   |   |   |   |   |
|                     |             | M   | 1                                   | 0 | 0     | 1                                        | 0 | 0                  | 0                        | 0        | 0     | 1                   | 0 | 0       | 1              | 0        | 0     | 1                                        | 0 | 0                  | 2 | 0        | 0     | 2                   | 0 | 0     | 3 | 0 | 0     | 1 | 0 | 0 | 1 | 0 | 0 | 2 | 0 | 0 | 2 | 0 | 0 |   |   |   |   |   |   |   |   |   |
| D E P U R A T I O N | FLUORESCENT | F   | 1                                   | 0 | 0     | 1                                        | 0 | 0                  | 0                        | 0        | 0     | 1                   | 0 | 0       | 1              | 0        | 0     | 1                                        | 0 | 0                  | 2 | 0        | 0     | 2                   | 0 | 0     | 3 | 0 | 0     | 1 | 0 | 0 | 1 | 0 | 0 | 2 | 0 | 0 | 2 | 0 | 0 | 2 | 0 | 0 |   |   |   |   |   |   |
|                     |             | F   | 1                                   | 0 | 0     | 1                                        | 0 | 0                  | 0                        | 0        | 0     | 1                   | 0 | 0       | 1              | 0        | 0     | 1                                        | 0 | 0                  | 2 | 0        | 0     | 2                   | 0 | 0     | 3 | 0 | 0     | 1 | 0 | 0 | 1 | 0 | 0 | 2 | 0 | 0 | 2 | 0 | 0 |   |   |   |   |   |   |   |   |   |
|                     |             | F   | 1                                   | 0 | 0     | 1                                        | 0 | 0                  | 0                        | 0        | 0     | 1                   | 0 | 0       | 1              | 0        | 0     | 1                                        | 0 | 0                  | 2 | 0        | 0     | 2                   | 0 | 0     | 3 | 0 | 0     | 1 | 0 | 0 | 1 | 0 | 0 | 2 | 0 | 0 | 2 | 0 | 0 |   |   |   |   |   |   |   |   |   |
|                     |             | M   | 1                                   | 0 | 0     | 1                                        | 0 | 0                  | 0                        | 0        | 0     | 1                   | 0 | 0       | 1              | 0        | 0     | 1                                        | 0 | 0                  | 2 | 0        | 0     | 2                   | 0 | 0     | 3 | 0 | 0     | 1 | 0 | 0 | 1 | 0 | 0 | 2 | 0 | 0 | 2 | 0 | 0 |   |   |   |   |   |   |   |   |   |
|                     |             | M   | 1                                   | 0 | 0     | 1                                        | 0 | 0                  | 0                        | 0        | 0     | 1                   | 0 | 0       | 1              | 0        | 0     | 1                                        | 0 | 0                  | 2 | 0        | 0     | 2                   | 0 | 0     | 3 | 0 | 0     | 1 | 0 | 0 | 1 | 0 | 0 | 2 | 0 | 0 | 2 | 0 | 0 |   |   |   |   |   |   |   |   |   |
|                     |             | M   | 1                                   | 0 | 0     | 1                                        | 0 | 0                  | 0                        | 0        | 0     | 1                   | 0 | 0       | 1              | 0        | 0     | 1                                        | 0 | 0                  | 2 | 0        | 0     | 2                   | 0 | 0     | 3 | 0 | 0     | 1 | 0 | 0 | 1 | 0 | 0 | 2 | 0 | 0 | 2 | 0 | 0 |   |   |   |   |   |   |   |   |   |
| D E P U R A T I O N | COSMETIC    | F   | 1                                   | 0 | 0     | 1                                        | 0 | 0                  | 0                        | 0        | 0     | 1                   | 0 | 0       | 1              | 0        | 0     | 1                                        | 0 | 0                  | 2 | 0        | 0     | 2                   | 0 | 0     | 3 | 0 | 0     | 1 | 0 | 0 | 1 | 0 | 0 | 2 | 0 | 0 | 2 | 0 | 0 | 2 | 0 | 0 |   |   |   |   |   |   |
|                     |             | F   | 1                                   | 0 | 0     | 1                                        | 0 | 0                  | 0                        | 0        | 0     | 1                   | 0 | 0       | 1              | 0        | 0     | 1                                        | 0 | 0                  | 2 | 0        | 0     | 2                   | 0 | 0     | 3 | 0 | 0     | 1 | 0 | 0 | 1 | 0 | 0 | 2 | 0 | 0 | 2 | 0 | 0 |   |   |   |   |   |   |   |   |   |
|                     |             | F   | 1                                   | 0 |       |                                          |   |                    |                          |          |       |                     |   |         |                |          |       |                                          |   |                    |   |          |       |                     |   |       |   |   |       |   |   |   |   |   |   |   |   |   |   |   |   |   |   |   |   |   |   |   |   |   |
